# Supplementary material
Source: HighWire-hosted journal article supplement (https://bmjopenquality.bmj.com/content/6/2/e000212)
Supplement: inline-supplementary-material-1 [file inline-supplementary-material-1.pdf]

**Supplement 1: Mapping the problem using the TDF and COM-B system (barriers to practice change, relevant TDF domains, components of COM-B system, intervention functions and behaviour change techniques.**

| <b>1. Physiotherapy: Improve delivery and documentation of a. sitting balance and b. treadmill training to eligible patients</b>                                                                                                                                                                          |                                                                                                           |                                                                                                       |                                                                                                                           |                                                                                                                                                                                                                                                                                                                                                        |
|-----------------------------------------------------------------------------------------------------------------------------------------------------------------------------------------------------------------------------------------------------------------------------------------------------------|-----------------------------------------------------------------------------------------------------------|-------------------------------------------------------------------------------------------------------|---------------------------------------------------------------------------------------------------------------------------|--------------------------------------------------------------------------------------------------------------------------------------------------------------------------------------------------------------------------------------------------------------------------------------------------------------------------------------------------------|
| <b>Step 2: Assessing the problem</b><br><i>Which barriers and enablers need to be addressed?</i>                                                                                                                                                                                                          | <b>Step 2: Linking to TDF domains</b><br><i>Within which theoretical domains do the barriers operate?</i> | <b>Step 2: Mapping the BCW COM-B System to TDF domains</b><br><i>Relevant Components of the COM-B</i> | <b>Step 2: Linking Components of the COM-B system to Relevant Intervention Functions</b><br><i>Intervention Functions</i> | <b>Step 3: Forming Possible Solutions (Behaviour Change Techniques)</b><br><i>Interventions developed to overcome identified barriers and enhance enablers</i>                                                                                                                                                                                         |
| <p><b>Barrier:</b> Competing work priorities.</p> <p><b>Enabler:</b> Equipment required for sitting balance and treadmill training already available and used (e.g. treadmill, harness, table with marked out targets for seated reaching).</p> <p><b>Enabler:</b> Clinical protocols already in use.</p> | Environmental context and resources                                                                       | Physical<br><br>Opportunity                                                                           | Training                                                                                                                  | <p><b>Demonstration, instruction and practice of the behaviour/ intervention</b></p> <p><i>Phase 1:</i> Training session to review clinical protocols and practice skills required for sitting balance and treadmill training.</p>                                                                                                                     |
| <p><b>Barrier:</b> Lack of triggers and prompts to remind staff to deliver sitting balance and treadmill training.</p>                                                                                                                                                                                    | Memory, attention and decision processes                                                                  | Psychological Capability                                                                              | Environmental restructuring                                                                                               | <p><b>Prompts/Cues</b></p> <p><i>Phase 1 and 2:</i> Regular caseload review during education sessions to review patient suitability for sitting balance and treadmill training</p> <p><i>Phase 2:</i> Posters created and placed in physiotherapy gym to prompt staff and inform patients about the use of sitting balance and treadmill training.</p> |

|                                                                                                                                                                                                             |                                                              |                                                    |                                                                                  |                                                                                                                                                                                                                                                                                                                     |
|-------------------------------------------------------------------------------------------------------------------------------------------------------------------------------------------------------------|--------------------------------------------------------------|----------------------------------------------------|----------------------------------------------------------------------------------|---------------------------------------------------------------------------------------------------------------------------------------------------------------------------------------------------------------------------------------------------------------------------------------------------------------------|
| <b>Enabler:</b> Physiotherapy staff possessed knowledge of evidence and skills in sitting balance and treadmill training.                                                                                   | Knowledge Skills                                             | Psychological Capability                           | Education and training                                                           | <b>Demonstration, instruction and practice of the behaviour/ intervention</b><br><i>Phase 1:</i> Training sessions to review clinical protocols and practice skills required for sitting balance and treadmill training                                                                                             |
| <b>Barrier:</b> Concerns about the physical demands on staff and patients during treadmill training.<br><br><b>Barrier:</b> Beliefs that other types of training might produce the same or better outcomes. | Beliefs about capabilities<br><br>Beliefs about consequences | Reflective motivation<br><br>Reflective motivation | Persuasion                                                                       | <b>Use of credible sources. Encouraging staff to focus on past success</b><br><i>Phase 1:</i> Discussion in education sessions regarding published evidence for sitting balance and treadmill training and benefits of their use for staff and patients. Focus on patient successes with implementing intervention. |
| <b>2. Occupational Therapy: Improve screening, assessment and intervention for a. upper limb sensation impairment and b. neglect to eligible patients</b>                                                   |                                                              |                                                    |                                                                                  |                                                                                                                                                                                                                                                                                                                     |
| <b>Assessing the problem</b>                                                                                                                                                                                | <b>Linking to TDF domains</b>                                | <b>Mapping the BCW COM-B System to TDF domains</b> | <b>Linking Components of the COM-B system to Relevant Intervention Functions</b> | <b>Forming Possible Solutions (Behaviour Change Techniques)</b>                                                                                                                                                                                                                                                     |
| <b>Barrier:</b> Competing work priorities in terms of client intervention.                                                                                                                                  | Environmental context and resources                          | Physical opportunity                               | Environmental restructuring and enablement                                       | <b>Adding resources to environment</b><br><i>Phase 1 and 2:</i> Development and use of new screening assessment and rehabilitation protocols for sensation and neglect.                                                                                                                                             |
| <b>Barrier:</b> Lack of available assessment tools for sensation and neglect for use by OT staff.                                                                                                           | Environmental context and resources                          | Physical opportunity                               | Environmental restructuring and enablement                                       | <b>Adding resources to environment</b><br><i>Phase 1:</i> Review of published research on assessment tools available. Nottingham Sensory Assessment (NSA) and Catherine Bergego Scale (CBS) selected, obtained and implemented.                                                                                     |

|                                                                                                                                                                                                                                 |                                                               |                                                           |                   |                                                                                                                                                                                                                                                                                                                                                                     |
|---------------------------------------------------------------------------------------------------------------------------------------------------------------------------------------------------------------------------------|---------------------------------------------------------------|-----------------------------------------------------------|-------------------|---------------------------------------------------------------------------------------------------------------------------------------------------------------------------------------------------------------------------------------------------------------------------------------------------------------------------------------------------------------------|
| <p><b>Barrier:</b> Concerns about patient ability to complete sensory assessment</p> <p><b>Barrier:</b> Difficulty completing sensation neglect assessment and intervention due to competing rehabilitation/goal priorities</p> | <p>Beliefs about capabilities</p> <p>Intentions and Goals</p> | <p>Reflective motivation</p> <p>Reflective motivation</p> | <p>Persuasion</p> | <p><b>Use of credible sources.</b><br/> <b>Encouraging staff to focus on past success</b><br/> <i>Phase 1 and 2:</i> Discussion in education sessions regarding published evidence for and benefits of sensory assessment for patients and staff. Focus on success with implementation.</p>                                                                         |
| <p><b>Barrier:</b> Lack of knowledge of evidence regarding best practice assessment and intervention for upper limb sensory impairment and neglect</p>                                                                          | <p>Knowledge</p>                                              | <p>Psychological capability</p>                           | <p>Education</p>  | <p><b>Providing information about health consequences/outcomes of performing the behaviour</b><br/> <i>Phase 1:</i> Dissemination and review of clinical guidelines and published research re: best practice assessments and interventions for upper limb sensory impairment and neglect including outcomes of interventions.</p>                                   |
| <p><b>Barrier:</b> Lack of skills in neglect and sensation assessment and training</p>                                                                                                                                          | <p>Skills</p>                                                 | <p>Psychological capability</p>                           | <p>Training</p>   | <p><b>Demonstration, instruction and practice of the behaviour/ intervention</b><br/> <i>Phase 1:</i> Occupational therapists received training from a known expert in neglect rehabilitation<br/> <i>Phase 2:</i> Occupational therapists participated in a training session as well as joint neglect rehabilitation sessions with the stroke unit orthoptist.</p> |

| <b>3. Improve delivery and documentation of assessment, education and intervention provided to eligible patients with a. communication disorders including aphasia b. swallowing impairments</b>                                                                                                                                                                                                                                                                                                                      |                                                                     |                                                             |                                                                                         |                                                                                                                                                                                                                                                          |
|-----------------------------------------------------------------------------------------------------------------------------------------------------------------------------------------------------------------------------------------------------------------------------------------------------------------------------------------------------------------------------------------------------------------------------------------------------------------------------------------------------------------------|---------------------------------------------------------------------|-------------------------------------------------------------|-----------------------------------------------------------------------------------------|----------------------------------------------------------------------------------------------------------------------------------------------------------------------------------------------------------------------------------------------------------|
| <b><i>Assessing the problem</i></b>                                                                                                                                                                                                                                                                                                                                                                                                                                                                                   | <b><i>Linking to TDF domains</i></b>                                | <b><i>Mapping the BCW COM-B System to TDF domains</i></b>   | <b><i>Linking Components of the COM-B system to Relevant Intervention Functions</i></b> | <b><i>Forming Possible Solutions (Behaviour Change Techniques)</i></b>                                                                                                                                                                                   |
| <p><b>Barrier:</b> Lack of standardised aphasia screening tool available for use by speech pathology staff.</p> <p><b>Enabler:</b> Speech pathology staff demonstrated knowledge of various standardised tools used to screen for aphasia.</p>                                                                                                                                                                                                                                                                        | <p>Resources</p> <p>Knowledge</p>                                   | <p>Physical opportunity</p> <p>Psychological capability</p> | <p>Environmental restructuring and enablement</p>                                       | <p><b>Adding resources to environment</b><br/>Phase 1: Review of published research on aphasia screening tools available. Mississippi aphasia screening tool (MAST) selected obtained and implemented</p>                                                |
| <p><b>Barrier:</b> Lack of available aphasia friendly educational material for use by speech pathologists to use as part of their education of patients with communication and swallowing impairments.</p>                                                                                                                                                                                                                                                                                                            | <p>Resources</p>                                                    | <p>Physical opportunity</p>                                 | <p>Environmental restructuring</p>                                                      | <p><b>Adding resources to environment</b><br/>Phase 1 &amp; 2: Development of aphasia friendly educational materials re: communication and swallowing impairments.</p>                                                                                   |
| <p><b>Barrier:</b> Attitudes and beliefs about the difficulty in using standardised aphasia screening tools with non-English speaking stroke patients. Many tools/tests were not developed or validated for use with this population.</p> <p><b>Barrier:</b> Concerns about the consequences of wrongly interpreting results from standardised aphasia assessments, when used with people who are non-English speaking or with visual impairment. Concerns that language/vision problems would alter test scores.</p> | <p>Beliefs about capabilities</p> <p>Beliefs about consequences</p> | <p>Reflective motivation</p> <p>Reflective motivation</p>   | <p>Enablement</p>                                                                       | <p><b>Adding resources to environment</b><br/><i>Phase 1:</i> Review of published research on aphasia screening tools available, most appropriate tool selected and purchased for use with people who are non-English speaking or visually impaired.</p> |

|                                                                                                                 |                                                 |                                 |                                    |                                                                                                                                                                                                                                                                                                                                                                                                                                        |
|-----------------------------------------------------------------------------------------------------------------|-------------------------------------------------|---------------------------------|------------------------------------|----------------------------------------------------------------------------------------------------------------------------------------------------------------------------------------------------------------------------------------------------------------------------------------------------------------------------------------------------------------------------------------------------------------------------------------|
| <p><b>Barrier:</b> Limited time for intervention, assessment takes priority over intervention.</p>              | <p>Resources</p>                                | <p>Physical opportunity</p>     | <p>Environmental restructuring</p> | <p><b>Restructure the physical/social environment</b><br/> <i>Phase 2:</i> Development and implementation of a swallowing retraining group.</p>                                                                                                                                                                                                                                                                                        |
| <p><b>Barrier:</b> Swallowing retraining having a higher priority for intervention than communication.</p>      | <p>Resources</p>                                | <p>Physical opportunity</p>     | <p>Environmental restructuring</p> | <p><b>Adding resources to the environment</b><br/> <i>Phase 1 &amp; 2:</i> Aphasia friendly educational material developed included material on communication techniques to help reinforce skills taught in therapy sessions.<br/><br/> <i>Possible options for future consideration:</i><br/> Reintroduction of communication group. Use of technology such as laptops computers or tablets with communication training programs.</p> |
| <p><b>Barrier:</b> Lack of systems or prompts to remind staff to document an intervention or re-evaluation.</p> | <p>Memory, attention and decision processes</p> | <p>Psychological capability</p> | <p>Environmental restructuring</p> | <p><b>Adding resources to the environment</b><br/> <i>Phase 2:</i> Review, updating and implementation of documentation standards for communication and swallowing.</p>                                                                                                                                                                                                                                                                |

| <b>4. Improve delivery of education to eligible patients and family/carers</b>                                                     |                                          |                                                    |                                                                                  |                                                                                                                                                                                                                                                                                                                                                      |
|------------------------------------------------------------------------------------------------------------------------------------|------------------------------------------|----------------------------------------------------|----------------------------------------------------------------------------------|------------------------------------------------------------------------------------------------------------------------------------------------------------------------------------------------------------------------------------------------------------------------------------------------------------------------------------------------------|
| <b>Assessing the problem</b>                                                                                                       | <b>Linking to TDF domains</b>            | <b>Mapping the BCW COM-B System to TDF domains</b> | <b>Linking Components of the COM-B system to Relevant Intervention Functions</b> | <b>Forming Possible Solutions (Behaviour Change Techniques)</b>                                                                                                                                                                                                                                                                                      |
| <b>Enabler:</b> Nursing staff felt they had a good knowledge of stroke.                                                            | Knowledge                                | Psychological capability                           |                                                                                  |                                                                                                                                                                                                                                                                                                                                                      |
| <b>Barrier:</b> Insufficient skills to teach patients and carers effectively.                                                      | Skills                                   | Psychological capability                           | Training                                                                         | <b>Demonstration of and instruction about the behaviour/intervention</b><br><i>Phase 2:</i> Training in nursing department meeting on the use of education packs.                                                                                                                                                                                    |
| <b>Barrier:</b> Current recording system does not prompt to remind staff to document patient education when it has been delivered. | Memory, attention and decision processes | Psychological capability                           | Environment restructuring and enablement                                         | <b>Prompts/cues, Adding resources to environment</b><br><i>Phase 1 &amp; 2:</i> Development and implementation of an ink stamp to document education sessions or provision of educational material in the patient's medical record.<br><br><i>Phase 2:</i> Discussion in nursing department meetings to prompt use of ink stamp and education packs. |
| <b>Barrier:</b> Lack of written educational materials to give to patients, including translated materials.                         | Resources                                | Physical opportunity                               | Environmental restructuring                                                      | <b>Adding resources to environment</b><br><i>Phase 1:</i> Educational (including translated) materials obtained and education packs developed and implemented.                                                                                                                                                                                       |

| <b>5. Improve delivery and documentation of anxiety and depression screening and advice regarding return to work and driving</b>                                     |                                          |                                                           |                                                                                         |                                                                                                                                                                                                                                                                                                                                                                                                                                                                       |
|----------------------------------------------------------------------------------------------------------------------------------------------------------------------|------------------------------------------|-----------------------------------------------------------|-----------------------------------------------------------------------------------------|-----------------------------------------------------------------------------------------------------------------------------------------------------------------------------------------------------------------------------------------------------------------------------------------------------------------------------------------------------------------------------------------------------------------------------------------------------------------------|
| <b><i>Assessing the problem</i></b>                                                                                                                                  | <b><i>Linking to TDF domains</i></b>     | <b><i>Mapping the BCW COM-B System to TDF domains</i></b> | <b><i>Linking Components of the COM-B system to Relevant Intervention Functions</i></b> | <b><i>Forming Possible Solutions (Behaviour Change Techniques)</i></b>                                                                                                                                                                                                                                                                                                                                                                                                |
| <b>Barrier:</b> Lack of systems or prompts to prompt discussion and documentation about return to work and driving, and diagnosis/ management of anxiety/depression. | Memory, attention and decision processes | Psychological capability                                  | Environment restructuring and enablement                                                | <b>Prompts/cues, Adding resources to environment</b><br>Phase 1 & 2: Development and implementation of a case conference form in consultation with stroke team.<br><br>Form used in weekly case conference to prompt discussion/documentation regarding regarding return to work, driving and anxiety/depression.                                                                                                                                                     |
| <b>1. Additional interventions used</b>                                                                                                                              |                                          |                                                           |                                                                                         |                                                                                                                                                                                                                                                                                                                                                                                                                                                                       |
| In addition to the above named tailored interventions, audit feedback was provided and guidelines were disseminated to all disciplines.                              | -                                        | -                                                         | -                                                                                       | <b>Feedback on behaviour</b><br><i>Audit Feedback</i><br>All disciplines received and written and verbal feedback after each audit including:<br>audit reports (written), audit presentations (verbal) and verbal feedback in education sessions.<br><br><b>Credible sources</b><br><i>Guideline dissemination</i><br>Each discipline was provided with clinical guidelines focusing on the recommendations relevant to them and the nominated areas for improvement. |

|                                                                                                  |                                       |                       |   |   |
|--------------------------------------------------------------------------------------------------|---------------------------------------|-----------------------|---|---|
| <b>2. Common enablers</b>                                                                        |                                       |                       |   |   |
| All disciplines showed a strong desire and motivation to improve/change practice.                | Intentions                            | Reflective motivation | - | - |
| All disciplines identified with the nominated practice areas as part of their professional role. | Social/professional role and identity | Reflective motivation | - | - |
| <b>3. Barriers unable to be addressed by the scope of the study</b>                              |                                       |                       |   |   |
| Fluctuating staff levels (identified by speech pathology and occupational therapy staff).        | Resources                             | Physical opportunity  | - | - |

Phase 1 (February-November 2010), Phase 2 (November 2010-May 2011)



## Supplement 2: Sample Criteria from Audit Tool

|                                                                                                                             |            |           |            |                                            |                                                                                                             |                                                                                           |
|-----------------------------------------------------------------------------------------------------------------------------|------------|-----------|------------|--------------------------------------------|-------------------------------------------------------------------------------------------------------------|-------------------------------------------------------------------------------------------|
| <b>COMMUNICATION</b>                                                                                                        | <b>Yes</b> | <b>No</b> | <b>N/A</b> | <b>Comments</b>                            | <b>Sources of info</b>                                                                                      | <b>Eligibility</b>                                                                        |
| Was the patient screened for:<br>(a) Aphasia                                                                                |            |           |            | <b>Date:</b><br><b>Tool:</b>               | Check for Mississippi Aphasia Screening Tool in SP progress notes or informal screen.                       | All stroke patients                                                                       |
| <b>UPPER LIMB</b>                                                                                                           | <b>Yes</b> | <b>No</b> | <b>N/A</b> | <b>Comments</b>                            | <b>Sources of info</b>                                                                                      | <b>Eligibility</b>                                                                        |
| Was the patient's sensory impairment further assessed using a standardised measure?                                         |            |           |            |                                            | Check for OT Nottingham Sensory Ax                                                                          | Patients screened as having sensory impairment                                            |
| <b>MOTOR FUNCTION/ CONTROL</b>                                                                                              | <b>Yes</b> | <b>No</b> | <b>N/A</b> | <b>Comments</b>                            | <b>Sources of info</b>                                                                                      | <b>Eligibility</b>                                                                        |
| Was task specific training provided for <b>seated reaching/sitting balance</b> ?                                            |            |           |            |                                            | Check PT progress notes<br>PT practice sheets                                                               | Patients with a sitting balance difficulty (MAS less than 5 for item 3 [Sitting balance]) |
| <b>DEPRESSION &amp; ANXIETY</b>                                                                                             | <b>Yes</b> | <b>No</b> | <b>N/A</b> | <b>Comments</b>                            | <b>Sources of info</b>                                                                                      | <b>Eligibility</b>                                                                        |
| Was the patient screened for:<br>(a) depression                                                                             |            |           |            |                                            | Check medical, RN notes, Case conference form                                                               | All stroke patients                                                                       |
| <b>NEGLECT &amp; INATTENTION</b>                                                                                            | <b>Yes</b> | <b>No</b> | <b>N/A</b> | <b>Comments</b>                            | <b>Sources of info</b>                                                                                      | <b>Eligibility</b>                                                                        |
| Was the patient offered &/or provided with intervention to treat neglect of body or space?                                  |            |           |            | Please list the type of treatment offered: | Check OT/Orthoptist progress notes                                                                          | Patients diagnosed with neglect                                                           |
| <b>EDUCATION</b>                                                                                                            | <b>Yes</b> | <b>No</b> | <b>N/A</b> | <b>Comments</b>                            | <b>Sources of info</b>                                                                                      | <b>Eligibility</b>                                                                        |
| <b>Was the patient &amp; carer provided with info covering:</b><br>• the nature of stroke, risk factors, & signs & symptoms |            |           |            |                                            | Check all discipline notes, Check RN progress notes/stamp re: education package, education group attendance | All stroke patients                                                                       |
| <b>DRIVING</b>                                                                                                              | <b>Yes</b> | <b>No</b> | <b>N/A</b> | <b>Comments</b>                            | <b>Sources of info</b>                                                                                      | <b>Eligibility</b>                                                                        |
| If the patient wishes to drive, were they given information about driving after stroke using the national guidelines?       |            |           |            |                                            | Check OT progress notes, OT initial ax form, Case conference form, Orthoptist notes, Medical notes          | Stroke patients wishing to return to driving                                              |

Supplement 3: Excerpt from an audit feedback presentation

## Audit Results: Treadmill Training/ Sitting Balance

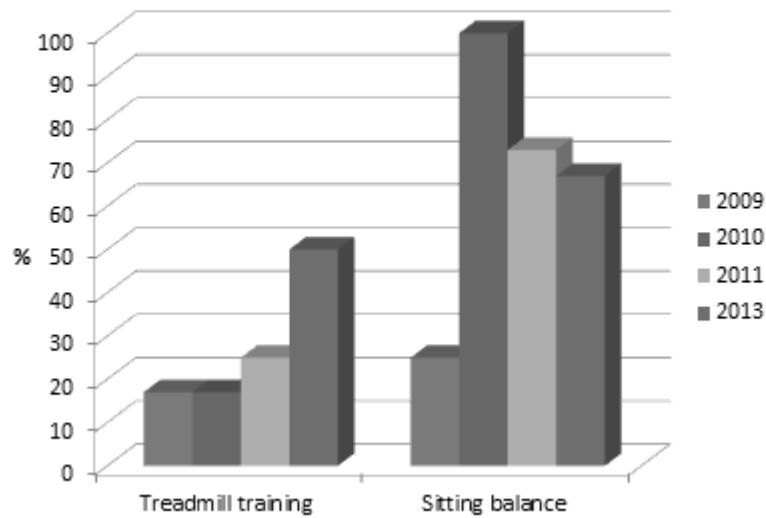

## Audit Results: Education

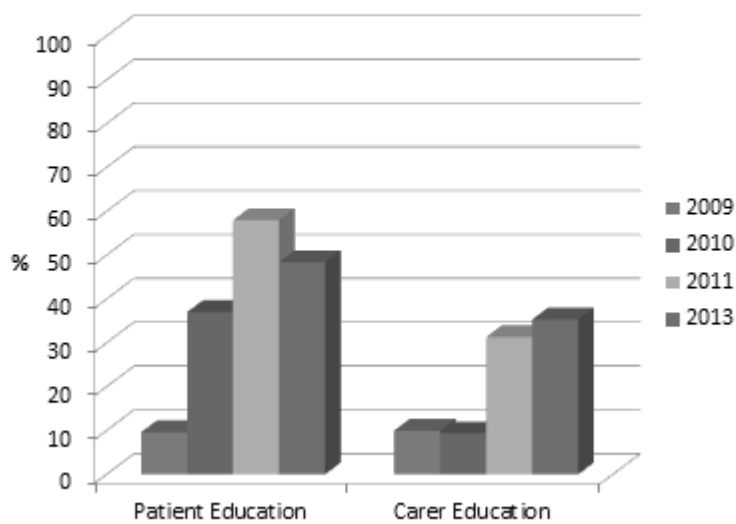

## Supplement 4: Excerpt from an audit feedback report

| <p>An Implementation Study to Increase the Uptake of Evidence in Stroke Rehabilitation<br/>Bankstown-Lidcombe Hospital Stroke Unit, Sydney, NSW</p> <p><b>Audit Results- July 2010</b></p>                                                                                                                                                                           |      |            |       |      |
|----------------------------------------------------------------------------------------------------------------------------------------------------------------------------------------------------------------------------------------------------------------------------------------------------------------------------------------------------------------------|------|------------|-------|------|
| <b>GOOD PRACTICE/ DOCUMENTATION:</b>                                                                                                                                                                                                                                                                                                                                 |      |            |       |      |
| The following areas of practice were consistent with best practice guidelines, or at an acceptable level (i.e. 75% compliance with guideline recommendations or higher):                                                                                                                                                                                             |      |            |       |      |
| <ul style="list-style-type: none"> <li>Provision of <b>task specific practice</b> for patients with <b>lower limb</b> impairments was well documented (73% = 8/11 eligible patients)</li> </ul>                                                                                                                                                                      |      |            |       |      |
| <b>AREAS FOR IMPROVEMENT IN PRACTICE/DOCUMENTATION:</b>                                                                                                                                                                                                                                                                                                              |      |            |       |      |
| The following areas of practice could be improved (i.e. screening/ assessment procedures or interventions were underused or not routinely documented), with compliance rates of <b>60% or less</b> :                                                                                                                                                                 |      |            |       |      |
| <ul style="list-style-type: none"> <li><b>Provision of stroke information and education to patients/carers</b> (0% to 27%, 0/13 to 4/15 eligible patients).</li> </ul>                                                                                                                                                                                               |      |            |       |      |
| <b>9. NEGLECT &amp; INATTENTION</b>                                                                                                                                                                                                                                                                                                                                  |      |            |       |      |
| Compliance with recommendations regarding neglect and inattention                                                                                                                                                                                                                                                                                                    |      |            |       |      |
|                                                                                                                                                                                                                                                                                                                                                                      | Yes  |            | No    |      |
|                                                                                                                                                                                                                                                                                                                                                                      | n    | %          | n     | %    |
| Was the patient <i>screened for neglect/ inattention?</i> (Y/N)                                                                                                                                                                                                                                                                                                      | 8/15 | <b>53%</b> | 7/15  | 47%  |
| Was the <i>neglect/ inattention formally tested?</i> (Y/N)<br><b>(4 patients not applicable)</b>                                                                                                                                                                                                                                                                     | 0/11 | <b>0%</b>  | 11/11 | 100% |
| Was the patient <i>offered intervention to treat neglect of body or space?</i> (Y/N)<br><b>(7 patients not applicable)</b>                                                                                                                                                                                                                                           | 0/8  | <b>0%</b>  | 8/8   | 100% |
| Were appropriate strategies used for the management of impaired attention? (Y/N)<br><b>(9 patients not applicable)</b>                                                                                                                                                                                                                                               | 1/6  | <b>17%</b> | 5/6   | 83%  |
| <b>Summary:</b>                                                                                                                                                                                                                                                                                                                                                      |      |            |       |      |
| <ul style="list-style-type: none"> <li>Best practice guidelines for neglect screening were followed in 53% of cases, although no patients had an in-depth assessment of neglect completed (0%).</li> <li>Evidence-based interventions/ strategies for neglect rehabilitation were rarely provided (0% - body/ space problems; 17% - attentional problems)</li> </ul> |      |            |       |      |
